# Supplementary material
Source: MDPI journal article supplement (https://www.mdpi.com/2076-3298/10/12/208)
Supplement: s1 [file s1]

Archive with 3 entries (3 files):
- environments-2696399-supplementary_UPDATED.pdf
- PRISMA_2020_checklist.pdf
- PRISMA_2020_flow_diagram_new_SRs_v1.pdf
